# Supplementary material
Source: PubMed Central journal article supplement (PMC4213108)
Supplement: supp_pp.114.247130_247130suppdata.pdf [file supp_pp.114.247130_247130suppdata.pdf]

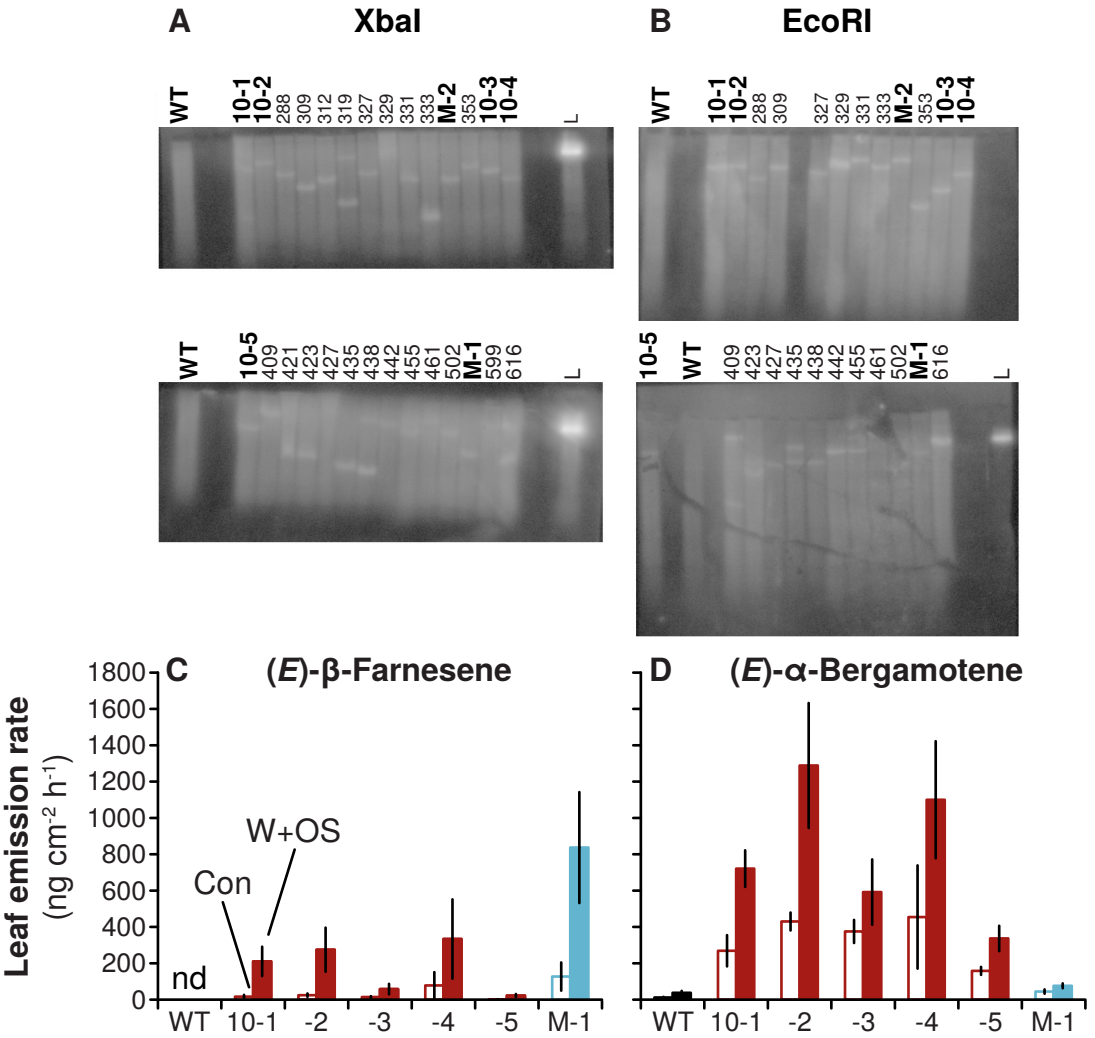

**Figure S1.** Selection of *TPS10* and *TPS10M* lines with a single transgene copy and enhanced emission of the target volatiles (*E*)- $\beta$ -farnesene and (*E*)- $\alpha$ -bergamotene (mean  $\pm$  SEM,  $n = 4$ ). (A, B) Images of Southern blots hybridized with a probe for the hygromycin resistance marker gene *HPTII* for independent lines of *TPS10* and *TPS10M* following digestion of DNA with XbaI (A) or EcoRI (B). Lanes are labeled with line numbers, WT (wild-type) or L (ladder positive control: contains the target *HPTII* sequence). *TPS10* and *TPS10M* lines selected for further experiments are indicated by line numbers in bold (*TPS10*: 10-#, *TPS10M*: M-#). Full line numbers are A-09-# (e.g. A-09-409); full line numbers for selected lines are A-09-279 (10-1), A-09-287 (10-2), A-09-389 (10-3), A-09-391 (10-4), A-09-396 (10-5), A-09-596 (M-1), and A-09-334 (M-2). Each line number represents a transformation event; homozygous lines from this event were used for experiments. (C) (*E*)- $\beta$ -Farnesene is present in the leaf headspace of *TPS10* (10-#, red) and *TPS10M* (M-1, blue), but not WT, constitutively and 24-32 h after W+OS treatment; emission from a line of *TPS10M* is greatest. Differences in (*E*)- $\beta$ -farnesene abundance among lines were not significant in control measurements ( $P = 0.3821$ ) but became significant after W+OS treatment ( $P = 0.0211$ ), and the effect of W+OS treatment on (*E*)- $\beta$ -farnesene abundance was also significant ( $P < 0.001$ ). (D) (*E*)- $\alpha$ -Bergamotene is detectable in the leaf headspace of *TPS10* and *TPS10M* lines and of WT constitutively, but increased 24-32 h after W+OS treatment ( $P = 0.0167$ ); the effect of line was significant both in control measurements ( $P = 0.0034$ ) and after W+OS treatment ( $P = 0.0011$ ).  $P$ -values result from Bonferroni correction of Kruskal-Wallis tests used to compare lines within treatments, and Wilcoxon rank-sum tests used to compare control and W+OS treatments for each volatile.

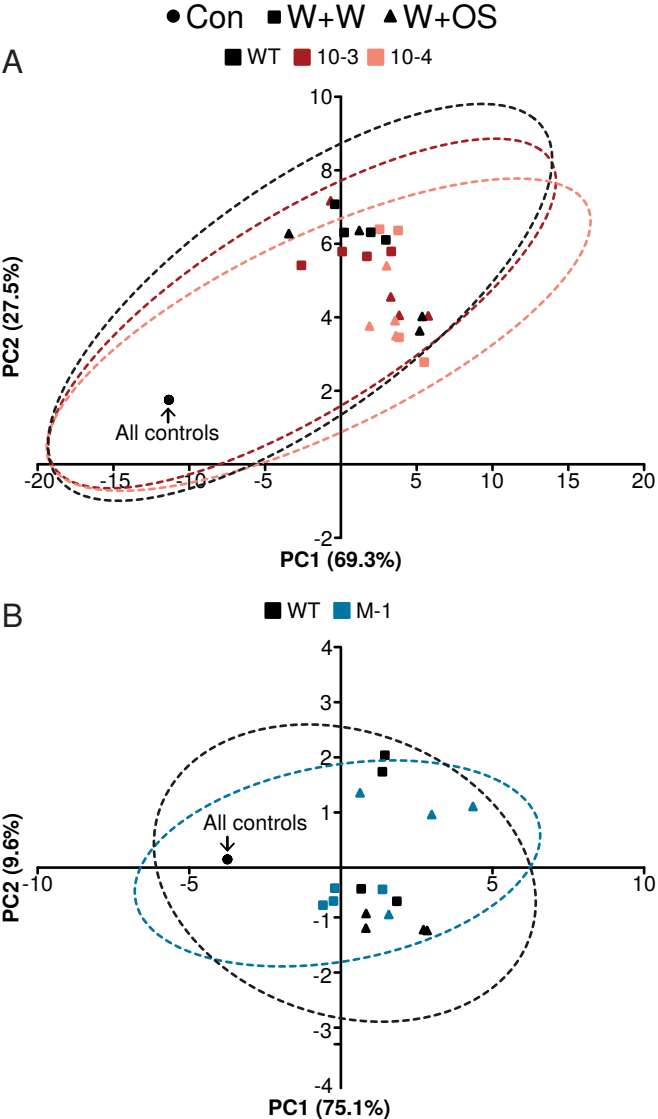

**Figure S2.** Green leaf volatiles (GLVs) are similar to WT in *TPS10* and *TPS10M* lines ( $n = 4$  samples per line per treatment,  $n = 12$  per line). A PCA with 95% confident intervals for each line is shown for all GLVs detected in the headspace of the +2 leaf in a comparison of WT and *TPS10* (A) or WT and *TPS10M* plants (B) for the first 3 h (during which the greatest amount of GLVs are released after damage) after no treatment (Con, circles) or treatment with W+W (squares) or W+OS (triangles).

● Con ■ W+W ▲ W+OS ◆ Lan × Lan+MJ

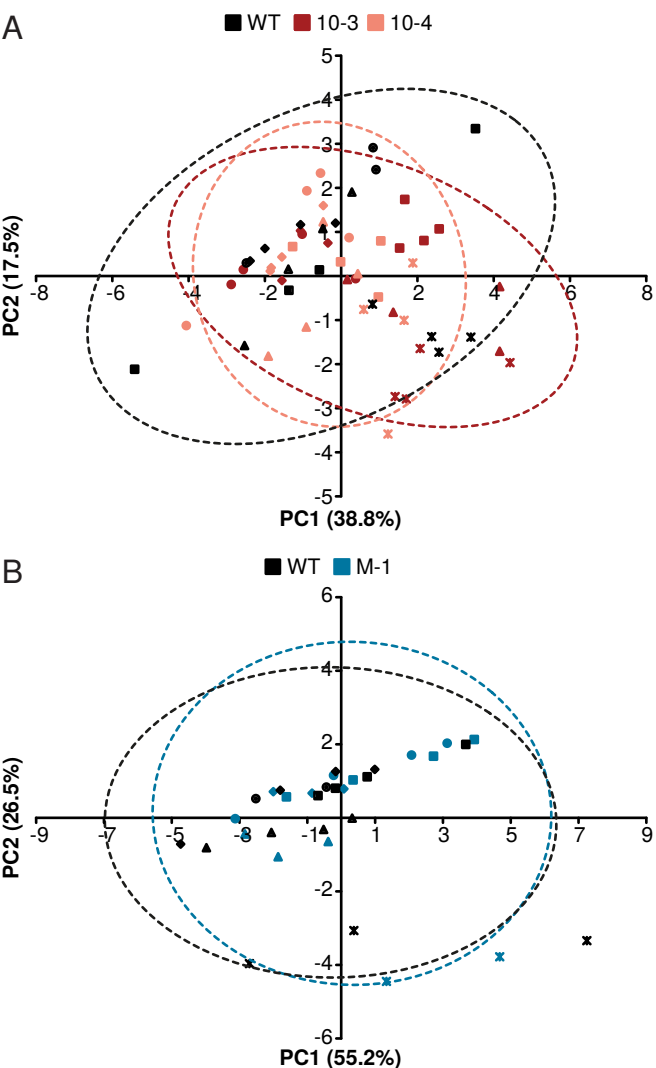

**Figure S3.** Plant volatiles (PVs) other than (*E*)- $\beta$ -farnesene and (*E*)- $\alpha$ -bergamotene are similar to WT in *TPS10* and *TPS10M* ( $n = 4$  samples per line per treatment,  $n = 12$  per genotype). A PCA with 95% confident intervals for each line is shown for all other PVs detected in the headspace of the +2 leaf in a comparison of WT and *TPS10* (A) or WT and *TPS10M* plants (B) for 24-32 h following treatment (during which the greatest amount of terpenoids are released after damage) from untreated leaves (Con, circles) or leaves treated with W+W (squares), W+OS (triangles), Lan (diamonds) or Lan+MJ (x's).

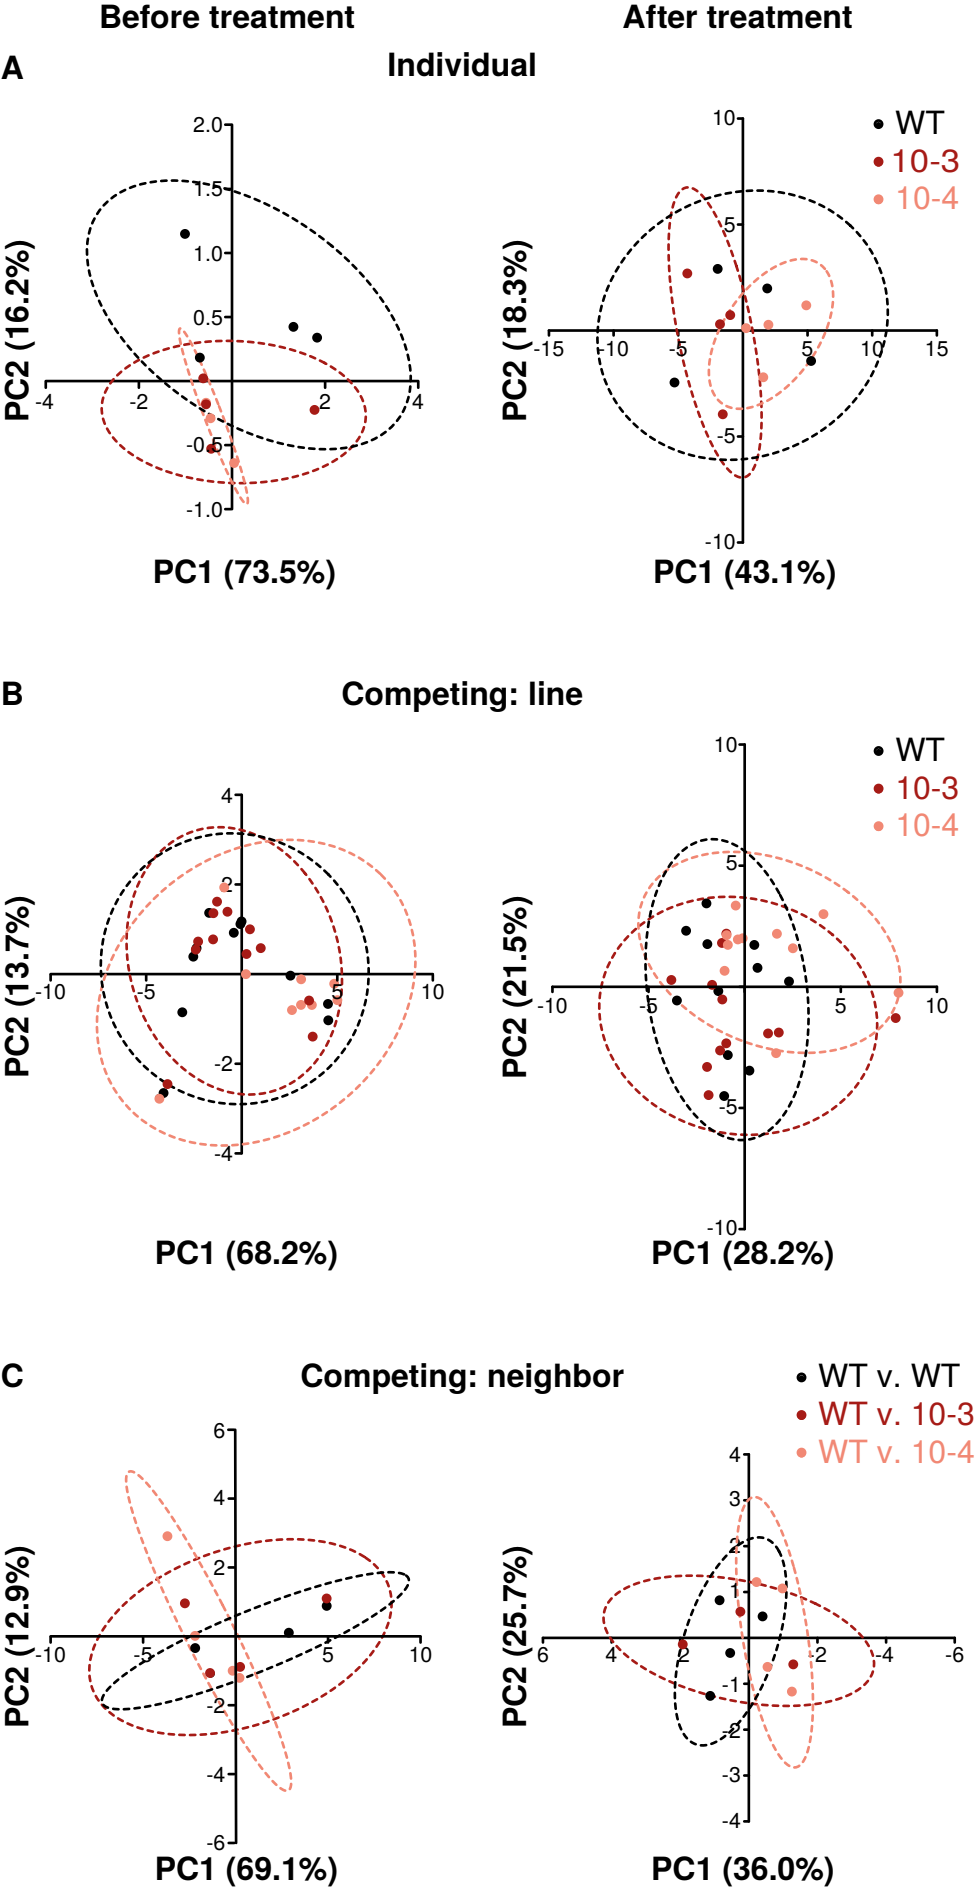

**Figure S4.** Plant volatiles other than *(E)*- $\beta$ -farnesene and *(E)*- $\alpha$ -bergamotene are similar to WT in *TPS10* and are not affected by competition. A PCA with 95% confident intervals for each line is shown for all other volatiles detected in the headspace of the +2 leaf in a comparison of WT and *TPS10* planted alone (A, n = 4 per line) or in competition (B, n = 12 per line), and for WT plants competing with neighbors of different genotypes (C, n = 4 per neighbor type), for 6 h before treatment (left panels) or for 0-6 h following the last of three elicitations with W+OS over 18 h across 2 d (right panels).

**Table S1.** Statistical analysis of (*E*)- $\beta$ -farnesene and (*E*)- $\alpha$ -bergamotene emission for two lines of *TPS10* and WT plants (Fig. 1), after applying the Holm-Bonferroni correction for the number of tests listed (No. tests). Significant *P*-values (< 0.05) are in **bold**, while marginal *P*-values (< 0.1) are in *italics*.

| <b>Compound</b>                    | <b>Treatment</b> | <b>Comparison</b> | <b>Test statistic</b> | <b>DF or n</b> | <b>No. tests</b> | <b>Corrected P</b> |
|------------------------------------|------------------|-------------------|-----------------------|----------------|------------------|--------------------|
| <i>(E)</i> - $\beta$ -Farnesene    | Con              | WT vs. 10-3       | W = 16                | n = 4          | 2                | <b>0.0421</b>      |
|                                    |                  | WT vs. 10-4       | W = 14                | n = 4          | 2                | <i>0.0689</i>      |
|                                    | W+W              | WT vs. 10-3       | W = 16                | n = 4          | 2                | <b>0.0421</b>      |
|                                    |                  | WT vs. 10-4       | W = 16                | n = 4          | 2                | <b>0.0211</b>      |
|                                    | W+OS             | WT vs. 10-3       | t = 3.397             | df = 4.639     | 2                | <b>0.0434</b>      |
|                                    |                  | WT vs. 10-4       | W = 12.5              | n = 4          | 2                | 0.2186             |
|                                    | Lan              | WT vs. 10-3       | W = 16                | n = 4          | 2                | <b>0.0421</b>      |
|                                    |                  | WT vs. 10-4       | W = 10                | n = 3 to 4     | 2                | 0.1227             |
|                                    | Lan+MJ           | WT vs. 10-3       | W = 16                | n = 4          | 2                | <b>0.0421</b>      |
|                                    |                  | WT vs. 10-4       | W = 16                | n = 4          | 2                | <b>0.0211</b>      |
| <i>(E)</i> - $\alpha$ -Bergamotene | Con              | WT vs. 10-3       | W = 16                | n = 4          | 2                | <i>0.0530</i>      |
|                                    |                  | WT vs. 10-4       | W = 16                | n = 4          | 2                | <i>0.0530</i>      |
|                                    | W+W              | WT vs. 10-3       | t = 4.885             | df = 3.957     | 2                | <b>0.0167</b>      |
|                                    |                  | WT vs. 10-4       | W = 15                | n = 4          | 2                | <i>0.0591</i>      |
|                                    | W+OS             | WT vs. 10-3       | t = 3.421             | df = 3.671     | 2                | <i>0.0612</i>      |
|                                    |                  | WT vs. 10-4       | t = 1.643             | df = 5.022     | 2                | 0.1611             |
|                                    | Lan              | WT vs. 10-3       | W = 16                | n = 4          | 2                | <i>0.0530</i>      |

| <b>Compound</b> | <b>Treatment</b> | <b>Comparison</b> | <b>Test statistic</b> | <b>DF or n</b> | <b>No. tests</b> | <b>Corrected P</b> |
|-----------------|------------------|-------------------|-----------------------|----------------|------------------|--------------------|
|                 |                  | WT vs. 10-4       | W = 9.5               | n = 3 to 4     | 2                | 0.2419             |
|                 | Lan+MJ           | WT vs. 10-3       | t = 3.946             | df = 3.759     | 2                | <b>0.0380</b>      |
|                 |                  | WT vs. 10-4       | t = 2.864             | df = 4.487     | 2                | <b>0.0400</b>      |

**Table S2.** Statistical analysis of (*E*)- $\beta$ -farnesene and (*E*)- $\alpha$ -bergamotene emission for one line of *TPS10M* and WT plants (Fig. 1). Significant *P*-values (< 0.05) are in **bold**.

| <b>Compound</b>                    | <b>Treatment</b> | <b>Comparison</b> | <b>Test statistic</b> | <b>DF or n</b> | <b>No. tests</b> | <b>P</b>      |
|------------------------------------|------------------|-------------------|-----------------------|----------------|------------------|---------------|
| <i>(E)</i> - $\beta$ -Farnesene    | Con              | WT vs. M-1        | W = 12                | n = 3 to 4     | 1                | <b>0.0436</b> |
|                                    | W+W              | WT vs. M-1        | W = 16                | n = 4          | 1                | <b>0.0211</b> |
|                                    | W+OS             | WT vs. M-1        | W = 12                | n = 3 to 4     | 1                | <b>0.0319</b> |
|                                    | Lan              | WT vs. M-1        | W = 12                | n = 3 to 4     | 1                | <b>0.0319</b> |
|                                    | Lan+MJ           | WT vs. M-1        | W = 6                 | n = 2 to 3     | 1                | 0.1066        |
| <i>(E)</i> - $\alpha$ -Bergamotene | Con              | WT vs. M-1        | t = 2.087             | df = 3.568     | 1                | 0.1136        |
|                                    | W+W              | WT vs. M-1        | t = 4.989             | df = 4.722     | 1                | <b>0.0048</b> |
|                                    | W+OS             | WT vs. M-1        | t = 4.276             | df = 4.751     | 1                | <b>0.0088</b> |
|                                    | Lan              | WT vs. M-1        | W = 12                | n = 4          | 1                | <b>0.0436</b> |
|                                    | Lan+MJ           | WT vs. M-1        | t = 0.0744            | df = 2.852     | 1                | 0.9456        |

**Table S3.** HGL-DTGS in two lines of *TPS10* and WT (mean  $\pm$  SEM, n = 4). Values are peak areas in counts\*s normalized to mg fresh mass relative to an internal standard. Corrected \**P* < 0.05, \*\**P* < 0.01 versus WT within the same treatment in Welch's t-tests after a Bonferroni correction for multiple comparisons (individual HGL-DTGS and total HGL-DTGS were tested, and WT was tested against each line; total HGL-DTGS are shown in Figure 4).

| Compound          | Line | Con                        | W+W                        | W+OS                      | Lan                          | Lan+MJ                    |
|-------------------|------|----------------------------|----------------------------|---------------------------|------------------------------|---------------------------|
| Lyciumoside I     | WT   | <b>3.43</b> $\pm$ 1.16     | <b>2.43</b> $\pm$ 0.51     | <b>2.08</b> $\pm$ 0.35    | <b>2.42</b> $\pm$ 0.17       | <b>4.78</b> $\pm$ 0.67    |
|                   | 10-3 | <b>1.95</b> $\pm$ 0.25     | <b>1.23</b> $\pm$ 0.11     | <b>1.53</b> $\pm$ 0.05    | <b>2.16</b> $\pm$ 0.30       | <b>3.51</b> $\pm$ 0.80    |
|                   | 10-4 | <b>2.25</b> $\pm$ 0.37     | <b>0.81</b> $\pm$ 0.20     | <b>1.49</b> $\pm$ 0.44    | <b>1.79</b> $\pm$ 0.54       | <b>4.08</b> $\pm$ 0.37    |
| Lyciumoside II    | WT   | <b>2.39</b> $\pm$ 0.38     | <b>3.65</b> $\pm$ 1.17     | <b>4.22</b> $\pm$ 0.51    | <b>1.64</b> $\pm$ 0.11       | <b>3.66</b> $\pm$ 0.60    |
|                   | 10-3 | <b>2.58</b> $\pm$ 0.25     | <b>3.21</b> $\pm$ 0.40     | <b>3.98</b> $\pm$ 0.75    | <b>2.43</b> $\pm$ 0.37       | <b>3.02</b> $\pm$ 0.55    |
|                   | 10-4 | <b>2.71</b> $\pm$ 0.19     | <b>2.56</b> $\pm$ 0.27     | <b>3.17</b> $\pm$ 0.32    | <b>4.31</b> $\pm$ 2.02       | <b>2.78</b> $\pm$ 0.33    |
| Lyciumoside IV    | WT   | <b>339.31</b> $\pm$ 39.83  | <b>604.60</b> $\pm$ 257.82 | <b>388.82</b> $\pm$ 50.61 | <b>329.36</b> $\pm$ 17.80    | <b>751.60</b> $\pm$ 99.53 |
|                   | 10-3 | <b>371.79</b> $\pm$ 12.54  | <b>418.69</b> $\pm$ 41.93  | <b>399.94</b> $\pm$ 55.69 | <b>403.76</b> $\pm$ 59.68    | <b>686.03</b> $\pm$ 62.16 |
|                   | 10-4 | <b>434.44</b> $\pm$ 24.38  | <b>335.42</b> $\pm$ 41.74  | <b>348.47</b> $\pm$ 47.93 | <b>740.98</b> $\pm$ 302.79   | <b>631.12</b> $\pm$ 73.05 |
| Nicotianoside I   | WT   | <b>268.78</b> $\pm$ 29.05  | <b>377.25</b> $\pm$ 85.33  | <b>306.27</b> $\pm$ 22.64 | <b>286.18</b> $\pm$ 7.78     | <b>520.05</b> $\pm$ 56.29 |
|                   | 10-3 | <b>283.22</b> $\pm$ 14.43  | <b>310.94</b> $\pm$ 13.69  | <b>290.43</b> $\pm$ 22.06 | <b>303.10</b> $\pm$ 28.15    | <b>476.38</b> $\pm$ 26.44 |
|                   | 10-4 | <b>299.43</b> $\pm$ 21.02  | <b>212.98</b> $\pm$ 11.58  | <b>271.78</b> $\pm$ 32.91 | ** <b>353.27</b> $\pm$ 10.51 | <b>462.49</b> $\pm$ 26.00 |
| Nicotianoside II  | WT   | <b>434.22</b> $\pm$ 124.93 | <b>345.57</b> $\pm$ 55.88  | <b>228.99</b> $\pm$ 20.05 | <b>172.63</b> $\pm$ 7.95     | <b>372.10</b> $\pm$ 53.58 |
|                   | 10-3 | <b>409.25</b> $\pm$ 92.68  | <b>382.82</b> $\pm$ 65.24  | <b>203.65</b> $\pm$ 22.71 | <b>146.57</b> $\pm$ 13.81    | <b>340.91</b> $\pm$ 18.38 |
|                   | 10-4 | <b>388.45</b> $\pm$ 113.38 | <b>179.92</b> $\pm$ 47.49  | <b>155.28</b> $\pm$ 25.98 | <b>161.73</b> $\pm$ 49.68    | <b>281.71</b> $\pm$ 25.75 |
| Nicotianoside III | WT   | <b>10.81</b> $\pm$ 1.37    | <b>15.80</b> $\pm$ 4.00    | <b>11.95</b> $\pm$ 0.95   | <b>9.73</b> $\pm$ 0.70       | <b>21.77</b> $\pm$ 3.08   |



| <b>Compound</b>   | <b>Line</b> | <b>Con</b>            | <b>W+W</b>            | <b>W+OS</b>           | <b>Lan</b>            | <b>Lan+MJ</b>         |
|-------------------|-------------|-----------------------|-----------------------|-----------------------|-----------------------|-----------------------|
| Nicotianoside IV  | 10-3        | <b>11.45</b> ± 0.62   | <b>13.42</b> ± 0.26   | <b>11.12</b> ± 0.95   | <b>10.82</b> ± 1.00   | <b>20.61</b> ± 1.81   |
|                   | 10-4        | <b>11.65</b> ± 0.86   | <b>8.89</b> ± 0.45    | <b>9.71</b> ± 1.32    | <b>17.16</b> ± 3.52   | <b>17.74</b> ± 1.51   |
|                   | WT          | <b>93.72</b> ± 22.08  | <b>119.91</b> ± 19.92 | <b>91.18</b> ± 7.12   | <b>67.86</b> ± 5.63   | <b>160.11</b> ± 26.77 |
|                   | 10-3        | <b>91.50</b> ± 9.48   | <b>122.43</b> ± 10.08 | <b>84.53</b> ± 5.48   | <b>73.25</b> ± 7.38   | <b>162.90</b> ± 12.29 |
| Nicotianoside V   | 10-4        | <b>90.92</b> ± 11.71  | <b>61.71</b> ± 8.35   | <b>71.55</b> ± 9.15   | <b>103.67</b> ± 13.20 | <b>126.18</b> ± 8.10  |
|                   | WT          | <b>122.78</b> ± 31.82 | <b>139.85</b> ± 13.95 | <b>134.13</b> ± 11.10 | <b>81.17</b> ± 9.66   | <b>234.02</b> ± 40.51 |
|                   | 10-3        | <b>110.59</b> ± 16.94 | <b>160.79</b> ± 16.94 | <b>114.20</b> ± 11.39 | <b>65.48</b> ± 6.89   | <b>234.94</b> ± 14.75 |
|                   | 10-4        | <b>88.10</b> ± 23.63  | * <b>65.83</b> ± 9.89 | <b>88.83</b> ± 16.06  | <b>85.95</b> ± 27.06  | <b>164.50</b> ± 9.50  |
| Attenoside        | WT          | <b>2.14</b> ± 0.38    | <b>6.52</b> ± 2.40    | <b>7.12</b> ± 0.57    | <b>1.62</b> ± 0.28    | <b>3.30</b> ± 0.70    |
|                   | 10-3        | <b>2.30</b> ± 0.26    | <b>5.50</b> ± 0.54    | <b>6.53</b> ± 1.48    | <b>2.17</b> ± 0.25    | <b>2.93</b> ± 0.65    |
|                   | 10-4        | <b>2.29</b> ± 0.17    | <b>2.99</b> ± 0.36    | <b>4.81</b> ± 0.79    | <b>6.05</b> ± 2.51    | <b>1.68</b> ± 0.30    |
| Nicotianoside VI  | WT          | <b>71.47</b> ± 14.94  | <b>163.87</b> ± 27.72 | <b>159.07</b> ± 18.14 | <b>40.67</b> ± 2.91   | <b>59.56</b> ± 10.43  |
|                   | 10-3        | <b>79.74</b> ± 8.00   | <b>161.91</b> ± 19.09 | <b>148.49</b> ± 27.33 | <b>47.39</b> ± 5.49   | <b>57.80</b> ± 9.26   |
|                   | 10-4        | <b>76.89</b> ± 11.57  | <b>73.35</b> ± 10.68  | <b>111.30</b> ± 11.83 | <b>77.60</b> ± 22.10  | <b>34.34</b> ± 2.16   |
| Nicotianoside VII | WT          | <b>17.47</b> ± 3.70   | <b>36.69</b> ± 3.48   | <b>45.77</b> ± 7.16   | <b>12.02</b> ± 1.00   | <b>15.19</b> ± 2.87   |
|                   | 10-3        | <b>17.12</b> ± 2.45   | <b>38.44</b> ± 2.75   | <b>40.26</b> ± 9.23   | <b>10.47</b> ± 0.85   | <b>14.29</b> ± 1.88   |
|                   | 10-4        | <b>13.61</b> ± 2.78   | * <b>14.99</b> ± 1.84 | <b>28.82</b> ± 3.87   | <b>15.84</b> ± 6.37   | <b>8.07</b> ± 0.93    |

**Table S4.** HGL-DTGS in one line of *TPS10M* and WT (mean  $\pm$  SEM, n = 4). Values are peak areas in counts\*s normalized to mg fresh mass relative to an internal standard. There were no significant differences (corrected  $P > 0.05$ ) in Welch's t-tests or Wilcoxon rank-sum tests between line M-1 and WT within each treatment after Bonferroni corrections for multiple comparisons (individual HGL-DTGs and total HGL-DTGs were tested, total HGL-DTGs are shown in Figure 4).

| <b>Compound</b>   | <b>Line</b> | <b>Con</b>                  | <b>W+W</b>                  | <b>W+OS</b>               | <b>Lan</b>                  | <b>Lan+MJ</b>               |
|-------------------|-------------|-----------------------------|-----------------------------|---------------------------|-----------------------------|-----------------------------|
| Lyciumoside I     | WT          | <b>2.76</b> $\pm$ 0.19      | <b>1.47</b> $\pm$ 0.25      | <b>2.62</b> $\pm$ 0.82    | <b>2.54</b> $\pm$ 0.37      | <b>17.72</b> $\pm$ 4.19     |
|                   | M-1         | <b>2.53</b> $\pm$ 0.51      | <b>2.07</b> $\pm$ 0.33      | <b>2.27</b> $\pm$ 0.32    | <b>2.24</b> $\pm$ 0.93      | <b>12.83</b> $\pm$ 3.14     |
| Lyciumoside II    | WT          | <b>14.28</b> $\pm$ 8.08     | <b>15.86</b> $\pm$ 5.01     | <b>6.57</b> $\pm$ 0.80    | <b>34.63</b> $\pm$ 3.06     | <b>9.66</b> $\pm$ 2.00      |
|                   | M-1         | <b>24.55</b> $\pm$ 3.57     | <b>24.05</b> $\pm$ 3.76     | <b>18.90</b> $\pm$ 8.52   | <b>19.58</b> $\pm$ 5.95     | <b>6.62</b> $\pm$ 1.05      |
| Lyciumoside IV    | WT          | <b>976.42</b> $\pm$ 160.26  | <b>1063.14</b> $\pm$ 136.72 | <b>455.57</b> $\pm$ 5.59  | <b>1602.69</b> $\pm$ 177.44 | <b>1352.12</b> $\pm$ 343.99 |
|                   | M-1         | <b>1273.83</b> $\pm$ 216.23 | <b>1412.91</b> $\pm$ 140.18 | <b>646.58</b> $\pm$ 83.34 | <b>1159.98</b> $\pm$ 342.72 | <b>1249.35</b> $\pm$ 214.24 |
| Nicotianoside I   | WT          | <b>143.42</b> $\pm$ 69.75   | <b>144.33</b> $\pm$ 44.34   | <b>236.96</b> $\pm$ 22.44 | <b>15.19</b> $\pm$ 1.71     | <b>666.60</b> $\pm$ 126.48  |
|                   | M-1         | <b>25.74</b> $\pm$ 20.88    | <b>93.25</b> $\pm$ 39.06    | <b>161.16</b> $\pm$ 52.98 | <b>13.62</b> $\pm$ 2.06     | <b>698.44</b> $\pm$ 105.94  |
| Nicotianoside II  | WT          | <b>59.52</b> $\pm$ 30.22    | <b>23.09</b> $\pm$ 14.62    | <b>106.98</b> $\pm$ 18.41 | <b>0.04</b> $\pm$ 0.01      | <b>317.89</b> $\pm$ 51.95   |
|                   | M-1         | <b>1.01</b> $\pm$ 0.79      | <b>7.84</b> $\pm$ 4.82      | <b>42.43</b> $\pm$ 21.53  | <b>0.07</b> $\pm$ 0.04      | <b>310.25</b> $\pm$ 39.75   |
| Nicotianoside III | WT          | <b>12.56</b> $\pm$ 2.36     | <b>13.95</b> $\pm$ 0.90     | <b>11.19</b> $\pm$ 0.57   | <b>14.16</b> $\pm$ 2.50     | <b>27.75</b> $\pm$ 5.21     |
|                   | M-1         | <b>8.71</b> $\pm$ 2.61      | <b>14.15</b> $\pm$ 1.84     | <b>9.41</b> $\pm$ 1.99    | <b>8.31</b> $\pm$ 2.46      | <b>28.44</b> $\pm$ 3.99     |
| Nicotianoside IV  | WT          | <b>38.92</b> $\pm$ 15.88    | <b>51.49</b> $\pm$ 10.07    | <b>48.59</b> $\pm$ 5.43   | <b>10.91</b> $\pm$ 1.70     | <b>146.51</b> $\pm$ 23.42   |
|                   | M-1         | <b>15.52</b> $\pm$ 10.85    | <b>41.94</b> $\pm$ 13.82    | <b>37.98</b> $\pm$ 11.21  | <b>7.88</b> $\pm$ 0.94      | <b>160.12</b> $\pm$ 18.18   |
| Nicotianoside V   | WT          | <b>16.73</b> $\pm$ 8.90     | <b>12.16</b> $\pm$ 7.42     | <b>55.56</b> $\pm$ 11.82  | <b>0.01</b> $\pm$ 0.01      | <b>157.35</b> $\pm$ 23.05   |
|                   | M-1         | <b>0.43</b> $\pm$ 0.40      | <b>3.74</b> $\pm$ 2.15      | <b>21.84</b> $\pm$ 11.57  | <b>0.10</b> $\pm$ 0.06      | <b>172.57</b> $\pm$ 16.79   |

| <b>Compound</b>   | <b>Line</b> | <b>Con</b>           | <b>W+W</b>           | <b>W+OS</b>           | <b>Lan</b>          | <b>Lan+MJ</b>       |
|-------------------|-------------|----------------------|----------------------|-----------------------|---------------------|---------------------|
| Attenoside        | WT          | <b>4.16</b> ± 1.96   | <b>13.44</b> ± 5.15  | <b>4.69</b> ± 0.35    | <b>15.50</b> ± 0.77 | <b>2.85</b> ± 0.62  |
|                   | M-1         | <b>7.11</b> ± 1.14   | <b>16.04</b> ± 2.21  | <b>14.23</b> ± 6.02   | <b>10.15</b> ± 2.41 | <b>2.45</b> ± 0.30  |
| Nicotianoside VI  | WT          | <b>37.90</b> ± 15.40 | <b>88.61</b> ± 7.31  | <b>107.33</b> ± 6.03  | <b>11.79</b> ± 1.07 | <b>49.70</b> ± 6.20 |
|                   | M-1         | <b>12.64</b> ± 5.94  | <b>71.84</b> ± 20.69 | <b>124.51</b> ± 12.50 | <b>11.68</b> ± 0.63 | <b>44.17</b> ± 5.00 |
| Nicotianoside VII | WT          | <b>3.50</b> ± 1.75   | <b>6.95</b> ± 2.44   | <b>28.66</b> ± 3.02   | <b>0.16</b> ± 0.03  | <b>8.64</b> ± 0.58  |
|                   | M-1         | <b>0.29</b> ± 0.22   | <b>3.08</b> ± 1.41   | <b>16.94</b> ± 5.80   | <b>0.18</b> ± 0.05  | <b>7.19</b> ± 0.70  |

**Table S5.** Statistical analysis of growth for two lines of *TPS10* and WT plants grown alone or in competition (Fig. 8), after applying the Bonferroni correction for the number of tests listed (No. tests). Significant *P*-values (<0.05) are in **bold**.

| Measurement      | Day | Individual/Competing    | Effect      | Test              | Test statistic     | DF | No. tests | Corrected P       |
|------------------|-----|-------------------------|-------------|-------------------|--------------------|----|-----------|-------------------|
| Rosette diameter | 27  | Individual              | Line        | Kruskal-Wallis    | $\chi^2 = 5.053$   | 2  | 2         | 0.1599            |
| Rosette diameter | 27  | Individual v. competing | Competition | Wilcoxon rank-sum | W = 217            |    | 3         | 0.1068            |
| Rosette diameter | 27  | Individual v. competing | Competition | Wilcoxon rank-sum | W = 181            |    | 3         | 0.9840            |
| Rosette diameter | 27  | Individual v. competing | Competition | Wilcoxon rank-sum | W = 129            |    | 3         | 1.0000            |
| Rosette diameter | 27  | Competing               | Line        | Kruskal-Wallis    | $\chi^2 = 7.0211$  | 2  | 3         | 0.0896            |
| Rosette diameter | 27  | Competing               | Neighbor    | Kruskal-Wallis    | $\chi^2 = 1.8998$  | 2  | 3         | 1.0000            |
| Rosette diameter | 30  | Individual              | Line        | Kruskal-Wallis    | $\chi^2 = 3.8116$  | 2  | 2         | 0.2974            |
| Rosette diameter | 30  | Individual v. competing | Competition | Wilcoxon rank-sum | W = 228            |    | 3         | <b>0.0446</b>     |
| Rosette diameter | 30  | Individual v. competing | Competition | Wilcoxon rank-sum | W = 213            |    | 3         | 0.1460            |
| Rosette diameter | 30  | Individual v. competing | Competition | Wilcoxon rank-sum | W = 158            |    | 3         | 1.0000            |
| Rosette diameter | 30  | Competing               | Line        | Kruskal-Wallis    | $\chi^2 = 4.9625$  | 2  | 3         | 0.2509            |
| Rosette diameter | 30  | Competing               | Neighbor    | Kruskal-Wallis    | $\chi^2 = 1.1909$  | 2  | 3         | 1.0000            |
| Rosette diameter | 34  | Individual              | Line        | Kruskal-Wallis    | $\chi^2 = 1.7395$  | 2  | 2         | 0.8382            |
| Rosette diameter | 34  | Individual v. competing | Competition | Wilcoxon rank-sum | W = 275            |    | 3         | <b>0.0003</b>     |
| Rosette diameter | 34  | Individual v. competing | Competition | Wilcoxon rank-sum | W = 289            |    | 3         | <b>&lt;0.0001</b> |
| Rosette diameter | 34  | Individual v. competing | Competition | Wilcoxon rank-sum | W = 289            |    | 3         | <b>&lt;0.0001</b> |
| Rosette diameter | 34  | Competing               | Line        | Kruskal-Wallis    | $\chi^2 = 14.8551$ | 2  | 4         | <b>0.0024</b>     |
| Rosette diameter | 34  | Competing               | Line        | Wilcoxon rank-sum | W = 221            |    | 4         | <b>0.0028</b>     |

| Measurement      | Day | Individual/Competing    | Effect      | Test              | Test statistic    | DF | No. tests | Corrected P       |
|------------------|-----|-------------------------|-------------|-------------------|-------------------|----|-----------|-------------------|
| Rosette diameter | 34  | Competing               | Line        | Wilcoxon rank-sum | $W = 669$         |    | 4         | <b>0.0045</b>     |
| Rosette diameter | 34  | Competing               | Line        | Wilcoxon rank-sum | $W = 439$         |    | 4         | 1.0000            |
| Rosette diameter | 34  | Competing               | Neighbor    | Kruskal-Wallis    | $\chi^2 = 0.1589$ | 2  | 4         | 1.0000            |
| Rosette diameter | 41  | Individual              | Line        | Kruskal-Wallis    | $\chi^2 = 0.7884$ | 2  | 2         | 1.0000            |
| Rosette diameter | 41  | Individual v. competing | Competition | Wilcoxon rank-sum | $W = 290$         |    | 3         | <b>&lt;0.0001</b> |
| Rosette diameter | 41  | Individual v. competing | Competition | Wilcoxon rank-sum | $W = 282$         |    | 3         | <b>&lt;0.0001</b> |
| Rosette diameter | 41  | Individual v. competing | Competition | Wilcoxon rank-sum | $W = 281$         |    | 3         | <b>0.0001</b>     |
| Rosette diameter | 41  | Competing               | Line        | Kruskal-Wallis    | $\chi^2 = 0.6326$ | 2  | 3         | 1.0000            |
| Rosette diameter | 41  | Competing               | Neighbor    | Kruskal-Wallis    | $\chi^2 = 0.4569$ | 2  | 3         | 1.0000            |
| Rosette diameter | 44  | Individual              | Line        | Kruskal-Wallis    | $\chi^2 = 0.5341$ | 2  | 2         | 1.0000            |
| Rosette diameter | 44  | Individual v. competing | Competition | Wilcoxon rank-sum | $W = 283$         |    | 3         | <b>&lt;0.0001</b> |
| Rosette diameter | 44  | Individual v. competing | Competition | Wilcoxon rank-sum | $W = 257$         |    | 3         | <b>&lt;0.0001</b> |
| Rosette diameter | 44  | Individual v. competing | Competition | Wilcoxon rank-sum | $W = 258$         |    | 3         | <b>0.0003</b>     |
| Rosette diameter | 44  | Competing               | Line        | Kruskal-Wallis    | $\chi^2 = 0.6977$ | 2  | 3         | 1.0000            |
| Rosette diameter | 44  | Competing               | Neighbor    | Kruskal-Wallis    | $\chi^2 = 0.9869$ | 2  | 3         | 1.0000            |
| Rosette diameter | 48  | Individual              | Line        | Kruskal-Wallis    | $\chi^2 = 1.1015$ | 2  | 2         | 1.0000            |
| Rosette diameter | 48  | Individual v. competing | Competition | Wilcoxon rank-sum | $W = 272$         |    | 3         | <b>&lt;0.0001</b> |
| Rosette diameter | 48  | Individual v. competing | Competition | Wilcoxon rank-sum | $W = 248$         |    | 3         | <b>0.0001</b>     |
| Rosette diameter | 48  | Individual v. competing | Competition | Wilcoxon rank-sum | $W = 266$         |    | 3         | <b>0.0001</b>     |
| Rosette diameter | 48  | Competing               | Line        | Kruskal-Wallis    | $\chi^2 = 0.2088$ | 2  | 3         | 1.0000            |

| Measurement      | Day | Individual/Competing    | Effect      | Test              | Test statistic    | DF | No. tests | Corrected P   |
|------------------|-----|-------------------------|-------------|-------------------|-------------------|----|-----------|---------------|
| Rosette diameter | 48  | Competing               | Neighbor    | Kruskal-Wallis    | $\chi^2 = 1.4376$ | 2  | 3         | 1.0000        |
| Stalk length     | 34  | Individual              | Line        | Kruskal-Wallis    | $\chi^2 = 1.123$  | 2  | 2         | 1.0000        |
| Stalk length     | 34  | Individual v. competing | Competition | Wilcoxon rank-sum | W = 108           |    | 3         | 0.5934        |
| Stalk length     | 34  | Individual v. competing | Competition | Wilcoxon rank-sum | W = 167           |    | 3         | 1.0000        |
| Stalk length     | 34  | Individual v. competing | Competition | Wilcoxon rank-sum | W = 162           |    | 3         | 1.0000        |
| Stalk length     | 34  | Competing               | Line        | Kruskal-Wallis    | $\chi^2 = 5.3606$ | 2  | 3         | 0.2056        |
| Stalk length     | 34  | Competing               | Neighbor    | Kruskal-Wallis    | $\chi^2 = 0.7864$ | 2  | 3         | 1.0000        |
| Stalk length     | 41  | Individual              | Line        | Kruskal-Wallis    | $\chi^2 = 1.9655$ | 2  | 2         | 0.7486        |
| Stalk length     | 41  | Individual v. competing | Competition | Wilcoxon rank-sum | W = 122           |    | 3         | 1.0000        |
| Stalk length     | 41  | Individual v. competing | Competition | Wilcoxon rank-sum | W = 213           |    | 3         | 0.1517        |
| Stalk length     | 41  | Individual v. competing | Competition | Wilcoxon rank-sum | W = 175           |    | 3         | 1.0000        |
| Stalk length     | 41  | Competing               | Line        | Kruskal-Wallis    | $\chi^2 = 4.9075$ | 2  | 3         | 0.2579        |
| Stalk length     | 41  | Competing               | Neighbor    | Kruskal-Wallis    | $\chi^2 = 0.4133$ | 2  | 3         | 1.0000        |
| Stalk length     | 44  | Individual              | Line        | Kruskal-Wallis    | $\chi^2 = 0.2858$ | 2  | 2         | 1.0000        |
| Stalk length     | 44  | Individual v. competing | Competition | Wilcoxon rank-sum | W = 186           |    | 3         | 0.3807        |
| Stalk length     | 44  | Individual v. competing | Competition | Wilcoxon rank-sum | W = 254           |    | 3         | <b>0.0014</b> |
| Stalk length     | 44  | Individual v. competing | Competition | Wilcoxon rank-sum | W = 225           |    | 3         | <b>0.0025</b> |
| Stalk length     | 44  | Competing               | Line        | Kruskal-Wallis    | $\chi^2 = 4.3566$ | 2  | 3         | 0.3396        |
| Stalk length     | 44  | Competing               | Neighbor    | Kruskal-Wallis    | $\chi^2 = 0.2875$ | 2  | 3         | 1.0000        |
| Stalk length     | 48  | Individual              | Line        | Kruskal-Wallis    | $\chi^2 = 0.893$  | 2  | 2         | 1.0000        |

| Measurement  | Day | Individual/Competing    | Effect      | Test              | Test statistic    | DF | No. tests | Corrected P       |
|--------------|-----|-------------------------|-------------|-------------------|-------------------|----|-----------|-------------------|
| Stalk length | 48  | Individual v. competing | Competition | Wilcoxon rank-sum | $W = 228$         |    | 3         | <b>0.0105</b>     |
| Stalk length | 48  | Individual v. competing | Competition | Wilcoxon rank-sum | $W = 269$         |    | 3         | <b>0.0001</b>     |
| Stalk length | 48  | Individual v. competing | Competition | Wilcoxon rank-sum | $W = 258$         |    | 3         | <b>&lt;0.0001</b> |
| Stalk length | 48  | Competing               | Line        | Kruskal-Wallis    | $\chi^2 = 4.8246$ | 2  | 3         | 0.2688            |
| Stalk length | 48  | Competing               | Neighbor    | Kruskal-Wallis    | $\chi^2 = 0.506$  | 2  | 3         | 1.0000            |
| Stalk length | 51  | Individual              | Line        | Kruskal-Wallis    | $\chi^2 = 1.3134$ | 2  | 2         | 1.0000            |
| Stalk length | 51  | Individual v. competing | Competition | Wilcoxon rank-sum | $W = 229$         |    | 3         | <b>0.0041</b>     |
| Stalk length | 51  | Individual v. competing | Competition | Wilcoxon rank-sum | $W = 267$         |    | 3         | <b>0.0001</b>     |
| Stalk length | 51  | Individual v. competing | Competition | Wilcoxon rank-sum | $W = 246$         |    | 3         | <b>&lt;0.0001</b> |
| Stalk length | 51  | Competing               | Line        | Kruskal-Wallis    | $\chi^2 = 2.5033$ | 2  | 3         | 0.8580            |
| Stalk length | 51  | Competing               | Neighbor    | Kruskal-Wallis    | $\chi^2 = 0.1037$ | 2  | 3         | 1.0000            |
| Stalk length | 55  | Individual              | Line        | Kruskal-Wallis    | $\chi^2 = 0.4196$ | 2  | 2         | 1.0000            |
| Stalk length | 55  | Individual v. competing | Competition | Wilcoxon rank-sum | $W = 223$         |    | 3         | <b>0.0032</b>     |
| Stalk length | 55  | Individual v. competing | Competition | Wilcoxon rank-sum | $W = 267$         |    | 3         | <b>0.0001</b>     |
| Stalk length | 55  | Individual v. competing | Competition | Wilcoxon rank-sum | $W = 221$         |    | 3         | <b>0.0001</b>     |
| Stalk length | 55  | Competing               | Line        | Kruskal-Wallis    | $\chi^2 = 1.1865$ | 2  | 3         | 1.0000            |
| Stalk length | 55  | Competing               | Neighbor    | Kruskal-Wallis    | $\chi^2 = 0.1494$ | 2  | 3         | 1.0000            |
| Stalk length | 59  | Individual              | Line        | Kruskal-Wallis    | $\chi^2 = 0.6218$ | 2  | 2         | 1.0000            |
| Stalk length | 59  | Individual v. competing | Competition | Wilcoxon rank-sum | $W = 217$         |    | 3         | <b>0.0023</b>     |
| Stalk length | 59  | Individual v. competing | Competition | Wilcoxon rank-sum | $W = 265$         |    | 3         | <b>0.0001</b>     |

| Measurement  | Day | Individual/Competing    | Effect      | Test              | Test statistic    | DF | No. tests | Corrected P       |
|--------------|-----|-------------------------|-------------|-------------------|-------------------|----|-----------|-------------------|
| Stalk length | 59  | Individual v. competing | Competition | Wilcoxon rank-sum | $W = 242$         |    | 3         | <b>0.0001</b>     |
| Stalk length | 59  | Competing               | Line        | Kruskal-Wallis    | $\chi^2 = 1.0272$ | 2  | 3         | 1.0000            |
| Stalk length | 59  | Competing               | Neighbor    | Kruskal-Wallis    | $\chi^2 = 0.2844$ | 2  | 3         | 1.0000            |
| Stalk length | 62  | Individual              | Line        | Kruskal-Wallis    | $\chi^2 = 1.5353$ | 2  | 2         | 0.9282            |
| Stalk length | 62  | Individual v. competing | Competition | Wilcoxon rank-sum | $W = 216$         |    | 3         | <b>0.0028</b>     |
| Stalk length | 62  | Individual v. competing | Competition | Wilcoxon rank-sum | $W = 262$         |    | 3         | <b>0.0002</b>     |
| Stalk length | 62  | Individual v. competing | Competition | Wilcoxon rank-sum | $W = 244$         |    | 3         | <b>&lt;0.0001</b> |
| Stalk length | 62  | Competing               | Line        | Kruskal-Wallis    | $\chi^2 = 0.5701$ | 2  | 3         | 1.0000            |
| Stalk length | 62  | Competing               | Neighbor    | Kruskal-Wallis    | $\chi^2 = 0.5951$ | 2  | 3         | 1.0000            |
| Stalk length | 66  | Individual              | Line        | Kruskal-Wallis    | $\chi^2 = 3.0814$ | 2  | 2         | 0.4284            |
| Stalk length | 66  | Individual v. competing | Competition | Wilcoxon rank-sum | $W = 215$         |    | 3         | <b>0.0030</b>     |
| Stalk length | 66  | Individual v. competing | Competition | Wilcoxon rank-sum | $W = 258$         |    | 3         | <b>0.0003</b>     |
| Stalk length | 66  | Individual v. competing | Competition | Wilcoxon rank-sum | $W = 234$         |    | 3         | <b>&lt;0.0001</b> |
| Stalk length | 66  | Competing               | Line        | Kruskal-Wallis    | $\chi^2 = 1.2635$ | 2  | 3         | 1.0000            |
| Stalk length | 66  | Competing               | Neighbor    | Kruskal-Wallis    | $\chi^2 = 0.2061$ | 2  | 3         | 1.0000            |



**Table S6.** Statistical analysis of reproduction for two lines of *TPS10* and WT plants grown alone or in competition (Fig. 9), after applying the Bonferroni correction for the number of tests listed (No. tests). Significant corrected *P*-values (<0.05) are in **bold**.

| Measurement     | Individual/Competing          | Effect      | Test                | Test statistic | DF     | No. tests | Corrected P       |
|-----------------|-------------------------------|-------------|---------------------|----------------|--------|-----------|-------------------|
| Buds            | Individual                    | Line        | ANOVA               | F = 2.681      | 2, 26  | 2         | 0.1748            |
| Buds            | Competing                     | Line        | ANOVA minimal model | F = 2.373      | 2, 72  | 2         | 0.2000            |
| Buds            | Individual v. competing, WT   | Competition | Welch's t-test      | t = 3.7759     | 16.184 | 2         | <b>0.0033</b>     |
| Buds            | Individual v. competing, 10-3 | Competition | Welch's t-test      | t = 4.6398     | 15.109 | 2         | <b>0.0006</b>     |
| Buds            | Individual v. competing, 10-4 | Competition | Welch's t-test      | t = 6.2095     | 13.691 | 2         | <b>0.0001</b>     |
| Flowers         | Individual                    | Line        | ANOVA               | F = 4.191      | 2, 26  | 2         | 0.0528            |
| Flowers         | Competing                     | Line        | ANOVA minimal model | F = 1.307      | 2, 72  | 2         | 0.5540            |
| Flowers         | Individual v. competing, WT   | Competition | Welch's t-test      | t = 2.7779     | 14.608 | 2         | <b>0.0287</b>     |
| Flowers         | Individual v. competing, 10-3 | Competition | Welch's t-test      | t = 1.9182     | 13.492 | 2         | 0.1530            |
| Flowers         | Individual v. competing, 10-4 | Competition | Welch's t-test      | t = 6.4014     | 16.048 | 2         | <b>&lt;0.0001</b> |
| Unripe capsules | Individual                    | Line        | ANOVA               | F = 2.997      | 2, 26  | 2         | 0.1348            |
| Unripe capsules | Competing                     | Line        | ANOVA minimal model | F = 6.481      | 2, 72  | 2         | <b>0.0052</b>     |
| Unripe capsules | Competing: 10-3 v. 10-4       | Line        | Tukey               |                |        | 2         | <b>0.0060</b>     |
| Unripe capsules | Competing: WT v. 10-3         | Line        | Tukey               |                |        | 2         | 0.0638            |
| Unripe capsules | Competing: WT v. 10-4         | Line        | Tukey               |                |        | 2         | 1.0000            |
| Unripe capsules | Individual v. competing, WT   | Competition | Welch's t-test      | t = 8.0416     | 14.095 | 2         | <b>&lt;0.0001</b> |
| Unripe capsules | Individual v. competing, 10-3 | Competition | Welch's t-test      | t = 7.0834     | 22.344 | 2         | <b>&lt;0.0001</b> |
| Unripe capsules | Individual v. competing, 10-4 | Competition | Welch's t-test      | t = 5.0078     | 13.499 | 2         | <b>0.0004</b>     |

| Measurement   | Individual/Competing          | Effect      | Test                | Test statistic | DF     | No. tests | Corrected P       |
|---------------|-------------------------------|-------------|---------------------|----------------|--------|-----------|-------------------|
| Ripe capsules | Individual                    | Line        | ANOVA               | F = 1.807      | 2, 26  | 2         | 0.3680            |
| Ripe capsules | Competing                     | Line        | ANOVA minimal model | F = 5.15       | 2, 72  | 2         | <b>0.0162</b>     |
| Ripe capsules | Competing: 10-3 v. 10-4       | Line        | Tukey               |                |        | 2         | <b>0.0299</b>     |
| Ripe capsules | Competing: WT v. 10-3         | Line        | Tukey               |                |        | 2         | 1.0000            |
| Ripe capsules | Competing: WT v. 10-4         | Line        | Tukey               |                |        | 2         | <b>0.0449</b>     |
| Ripe capsules | Individual v. competing, WT   | Competition | Welch's t-test      | t = 3.2678     | 9.621  | 2         | <b>0.0178</b>     |
| Ripe capsules | Individual v. competing, 10-3 | Competition | Welch's t-test      | t = 5.5625     | 20.767 | 2         | <b>&lt;0.0001</b> |
| Ripe capsules | Individual v. competing, 10-4 | Competition | Welch's t-test      | t = 4.9421     | 19.738 | 2         | <b>0.0002</b>     |
